# Supplementary material for: Synthesis, characterisation and thermal properties of Sn(ii) pyrrolide complexes
Source: Royal Society of Chemistry journal article supplement (doi:10.1039/c8dt00490k), 2018-01-01

## **Synthesis and Characterization of Sn(II) Pyrrolide Complexes for MOCVD and ALD applications.**

James D. Parish,<sup>a</sup> Michael W. Snook,<sup>a</sup> Andrew L. Johnson,<sup>a</sup> and Gabriele Kociok-Köhn<sup>b</sup>

<sup>a</sup> *Department of Chemistry, University of Bath. Claverton Down, Bath, BA2 7AY, UK.*

*E-mail: [A.L.Johnson@bath.ac.uk](mailto:A.L.Johnson@bath.ac.uk)*

<sup>b</sup> *Chemical Characterisation and Analysis Facility, Department of Chemistry, University of Bath. Claverton Down, Bath, BA2 7AY, UK.*

**Figure 1S:** Thermogravimetric analysis data for complex **2**.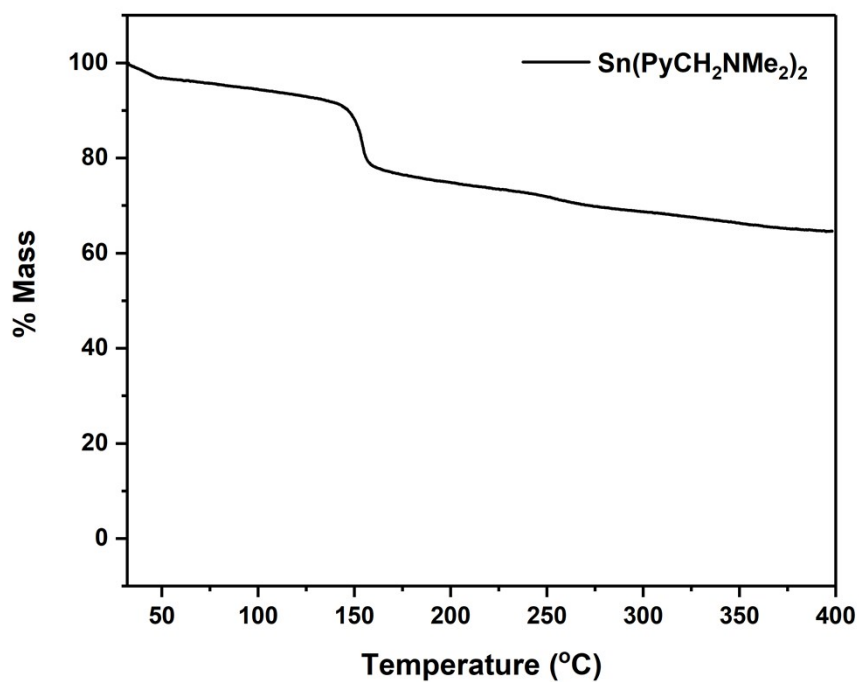**Figure 2S:** Plot of %Mass loss over time for complexes **3**, **4**, **5** and **8**.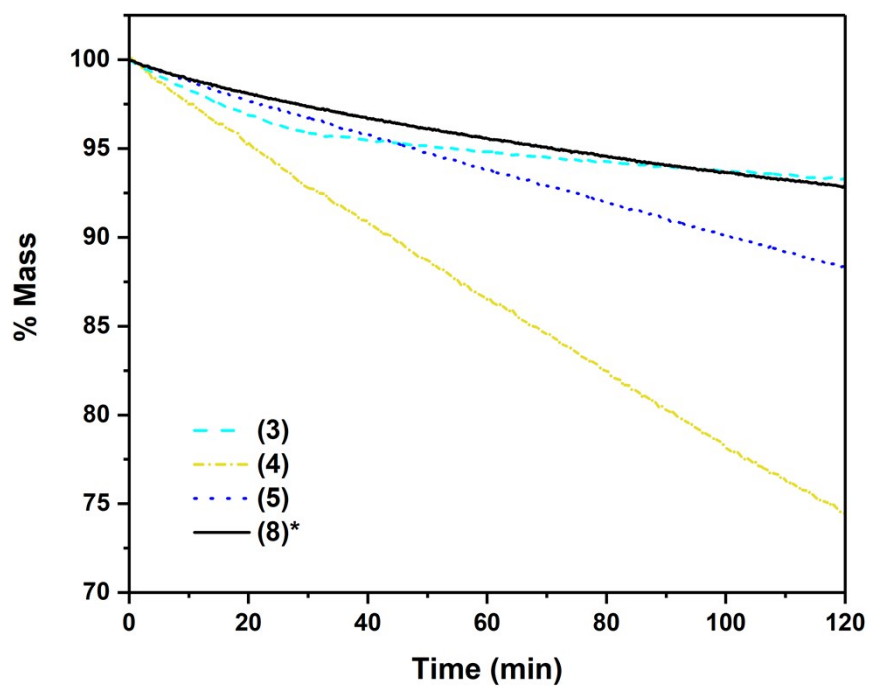

**Figure 3S:** Plot of %Mass loss over time for complexes **6** and **7**.

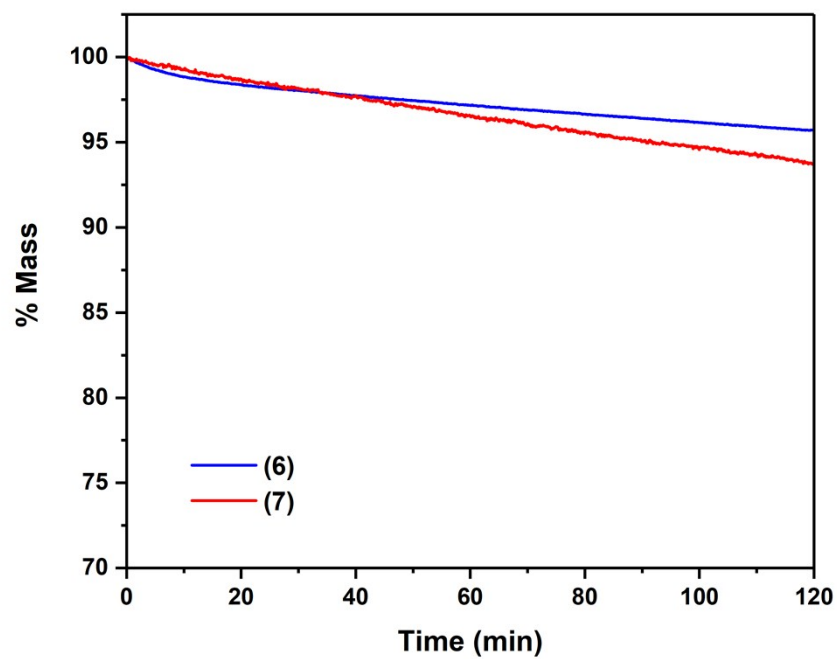

Supplement: c8dt00490k1.pdf [file c8dt00490k1.pdf]
